# Supplementary material for: High Levels of BMP2 Promote Liver Cancer Growth via the Activation of Myeloid-Derived Suppressor Cells
Source: Front Oncol. 2020 Mar 4;10:194. doi: 10.3389/fonc.2020.00194 (PMC7064622; doi:10.3389/fonc.2020.00194)

## Supplementary Material

A

Hepa1-6 to C57BL/6 mice(i.v. injection)

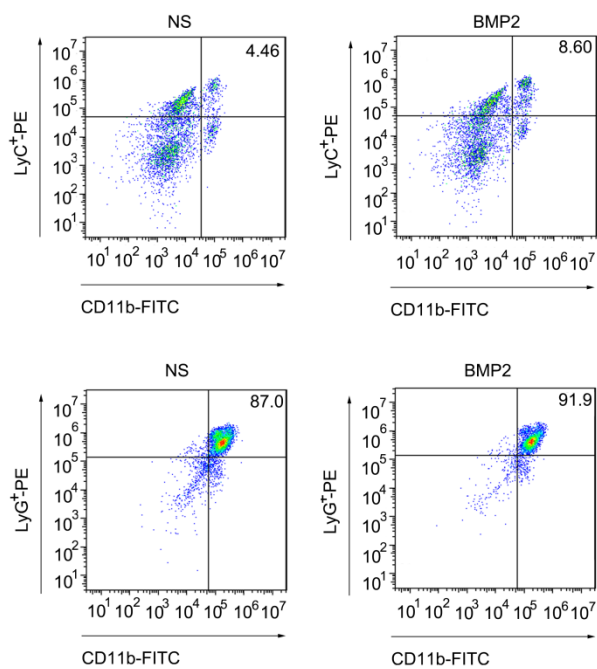

B

Hepa1-6 to C57BL/6 mice(materials implantation)

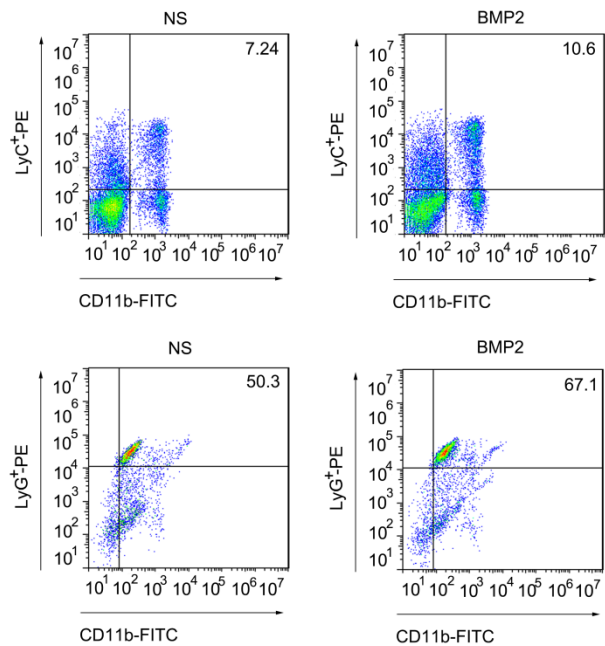

**Supplementary Figure 1. BMP2 promoted the expansion of MDSCs in peripheral blood.**

- (A) Represent flow cytometric images of monocyte derived MDSCs and polymorphonuclear derived MDSCs from rhBMP2 solution intravenously injected C57BL/6 mice.
- (B) Represent flow cytometric images of monocyte derived MDSCs and polymorphonuclear derived MDSCs from rhBMP2 collagen gels implanted injected C57BL/6 mice.

A

Hepa1-6 to C57BL/6 mice (materials implantation)

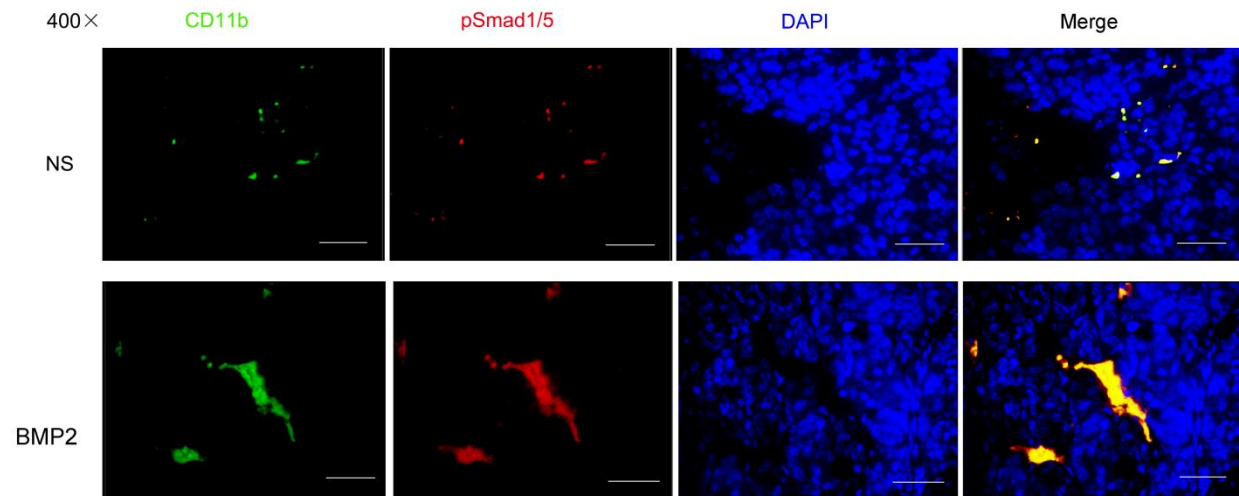

B

Hepa1-6 to C57BL/6 mice (materials implantation)

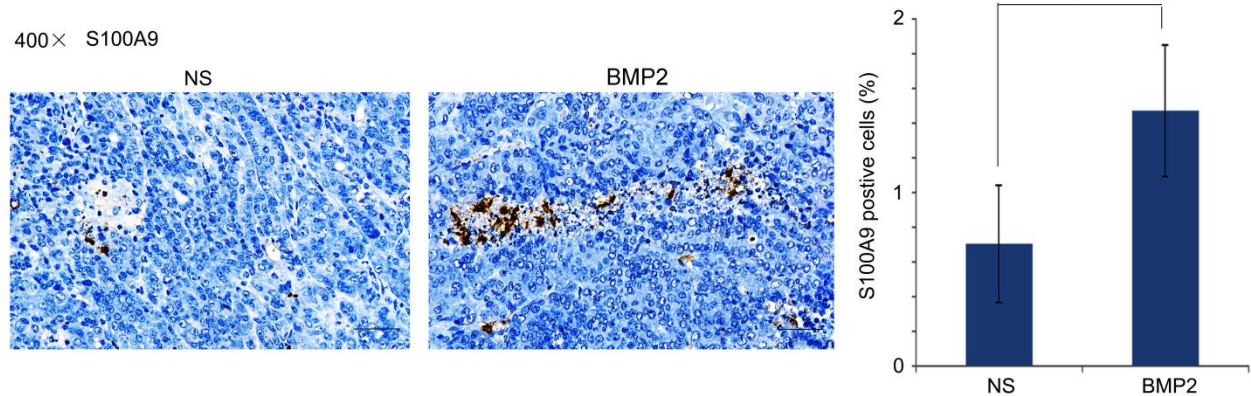

**Supplementary Figure 2. BMP2 promoted the infiltration of MDSCs into Hepa1-6 tumors.**

(A) Immunofluorescence images of subcutaneous Hepa1-6 tumor samples from rhBMP2 collagen gels implanted ICR mice. Blue: DAPI, Green: CD11b-FITC, Red: Smad1/5/8-TRITC. Scale bar: 100µm.

(B) Immunohistochemistry images indicated the expression of S100A9 of subcutaneous Hepa1-6 tumor samples from rhBMP2 collagen gels implanted ICR mice. Scale bar: 50µm. Average percentages of S100A9 positive cells of at least three fields were shown on the right. \*\*:  $P<0.01$ .

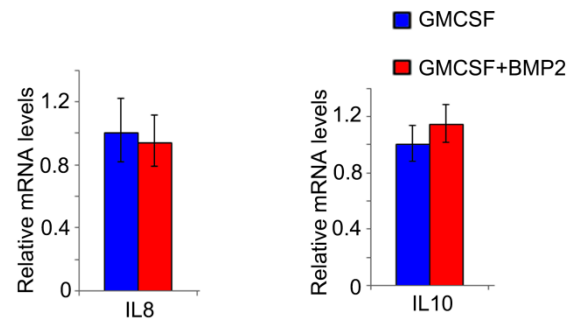

**Supplementary Figure 3. MDSCs activated by BMP2 did not secrete IL8 or IL10.**

Comparison of relative IL8 and IL10 mRNA levels of bone marrow cells treated with BMP2. \*:

$P < 0.05$ , \*\*:  $P < 0.01$

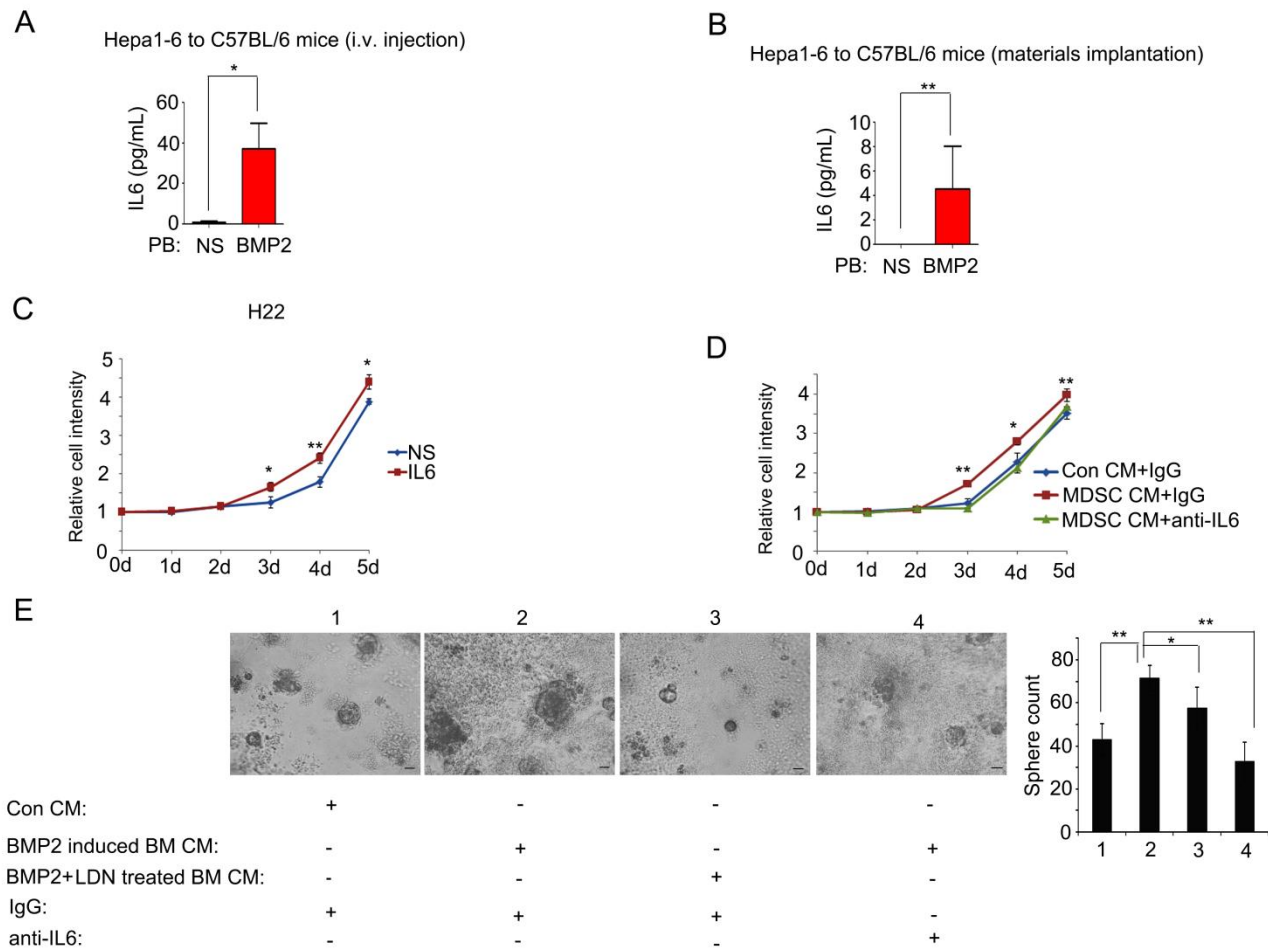

**Supplementary Figure 4. BMP2 inducing MDSCs expansion enhanced liver cancer growth via IL6.**

- (A) IL6 concentration in peripheral blood of rhBMP2 solution intravenously injected C57BL/6 mice for NS and rhBMP2 groups were compared. \*:  $P < 0.05$ , \*\*:  $P < 0.01$
- (B) IL6 concentration in peripheral blood of rhBMP2 collagen gels implanted C57BL/6 mice for NS and rhBMP2 groups were compared. \*:  $P < 0.05$ , \*\*:  $P < 0.01$
- (C) About 3,000 H22 cells were cultured in each well of 96 well plates with vehicle or IL6. Relative cell intensity was measured with a cell-counting kit after indicated time. \*:  $P < 0.05$ , \*\*:  $P < 0.01$

(D) About 3,000 H22 cells were cultured in each well of 96 well plates with indicated treatment.

Relative cell intensity was measured with a cell-counting kit after indicated time. \*:  $P < 0.05$ , \*\*:  $P < 0.01$

(E) Hepa1-6 cells of different treatment were cultured in matrigel to form spheres. Photos were taken after six days. Scale bars, 10 $\mu$ M.

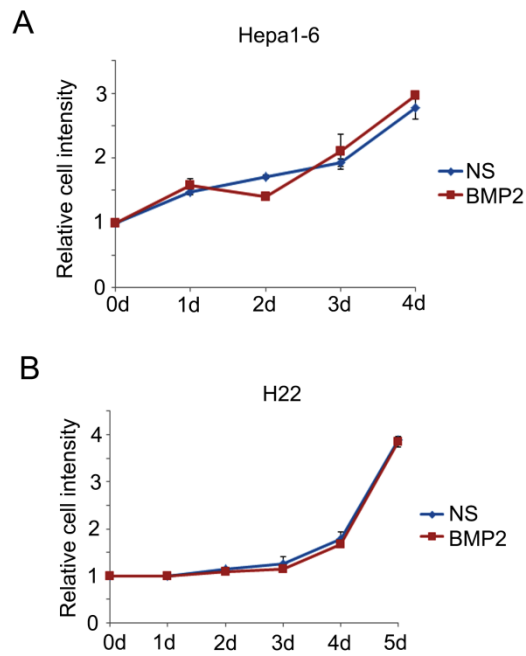

**Supplementary Figure 5. BMP2 did not affect the proliferation of HCC cells directly.**

(A) About 3,000 Hepa1-6 cells were cultured in each well of 96 well plates with vehicle or BMP2.

Relative cell intensity was measured with a cell-counting kit after indicated time. \*:  $P < 0.05$ , \*\*:  $P < 0.01$

(B) About 3,000 H22 cells were cultured in each well of 96 well plates with vehicle or BMP2.

Relative cell intensity was measured with a cell-counting kit after indicated time. \*:  $P < 0.05$ , \*\*:  $P < 0.01$

Original gels for Fig 5C

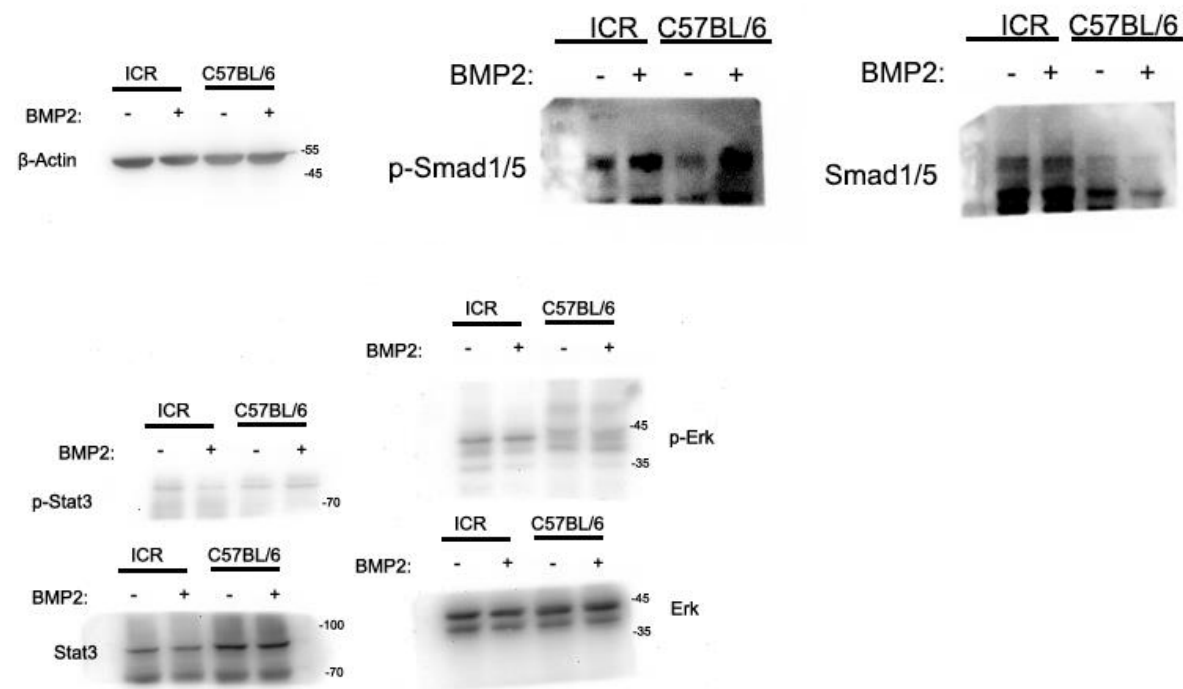

Supplement: Supplementary file 1 [file Data_Sheet_1.pdf]
